# Supplementary material
Source: publisher figshare collection journal article supplement (https://tandf.figshare.com/ndownloader/files/17358050)
Supplement: Supplementary file 1 [file 17358050]

**Supplemental Table S1**

Survey and Focus Group Questions/Interview Script

1. What do you feel is the most important factor to consider when prescribing assistive devices for patients?
2. At the beginning of care, do you always provide a mobility assistive device (MAD) to your patients with stroke?  with Traumatic Brain Injury (TBI)?
3. Does your approach differ between patients with stroke and TBI? If so, how?
4. How does your clinical experience with these diagnoses affect your decision making? Does it come from your clinical experience your employer?
5. Do you use objective tools to select MAD use? If so, which ones?
6. If you use objective tools for any reason, would you name the reasons and the tools you tend to use most?
7. How long do you train your patients with stroke or TBI on your chosen MAD before you decide to change it or continue with it?
8. What factors do you use if you decide to change a device?
9. How does your PT experience affect your decision-making?
10. Are there any policies that you have to follow when prescribing assistive devices?
11. If the patient has used a cane or walker previously, does that affect your decision-making?
